# Supplementary material for: Controlled synthesis of Bi2O2CO3 nanorods with enhanced photocatalytic performance
Source: Royal Society of Chemistry journal article supplement (doi:10.1039/d1ce00242b), 2021-01-01
Supplement: d1ce00242b1.pdf [file d1ce00242b1.pdf]

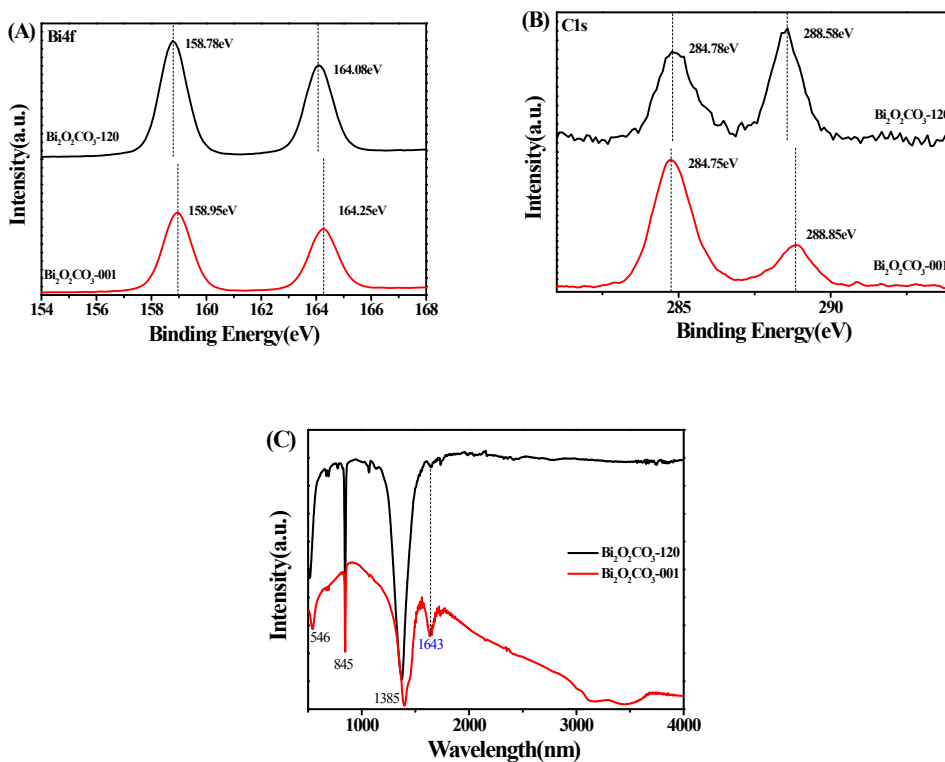

Fig. S1 The XPS spectra of Bi 4f (A) and C 1s (B), FT- IR spectra (C) for Bi<sub>2</sub>O<sub>2</sub>CO<sub>3</sub>-120.

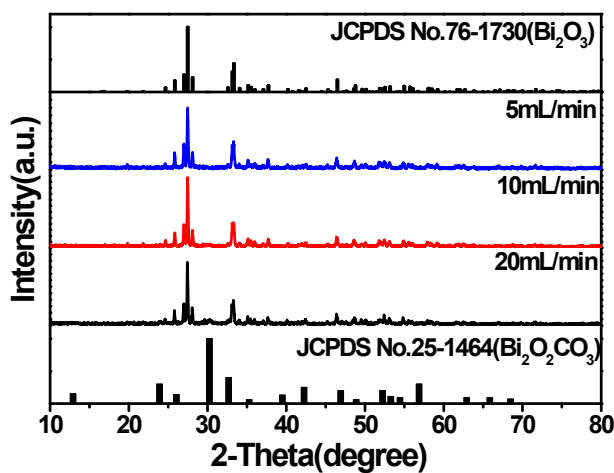

Fig.S2 The XRD patterns of the obtained Bi<sub>2</sub>O<sub>2</sub>CO<sub>3</sub> (A) kept at 300 °C for different flow rate of N<sub>2</sub>.

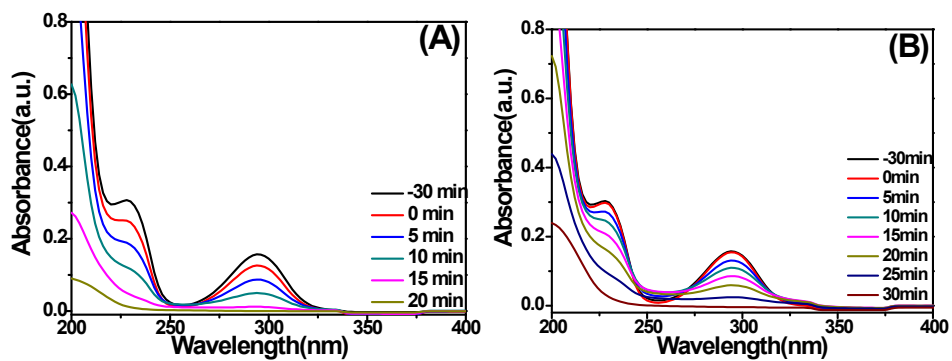

Fig. S3 UV-vis absorbance spectra of SA using  $\text{Bi}_2\text{O}_2\text{CO}_3$  nanorod (A) and nanosheet (B) as photocatalysts

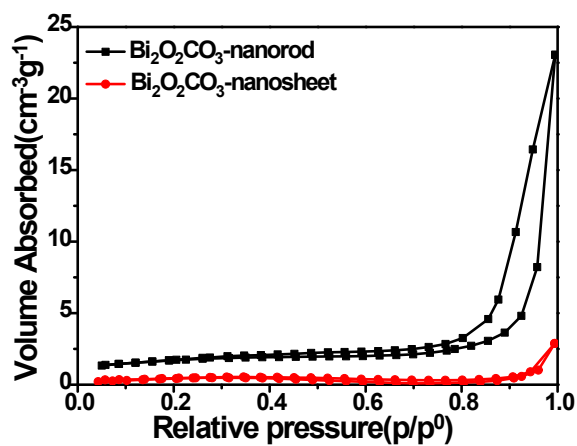

Fig. S4  $\text{N}_2$  adsorption/desorption isotherm of  $\text{Bi}_2\text{O}_2\text{CO}_3$  nanosheet and nanorod.
